# Supplementary material for: A Bispecific METxMET Antibody–Drug Conjugate with Cleavable Linker Is Processed in Recycling and Late Endosomes
Source: Oxford University Press journal article supplement (doi:10.1158/1535-7163.mct-22-0414), 2023-01-11
Supplement: mct-22-0414_supplementary_table_1_suppst1.docx [file mct-22-0414_supplementary_table_1_suppst1.docx]

Supplementary table 1.

List of genes contained in the CRISPR RNA library.

| **Gene Symbol** | **Gene ID** |
| --- | --- |
| CLTA | 1211 |
| CLTB | 1212 |
| CLTC | 1213 |
| CLTCL1 | 8218 |
| AP1M1 | 8907 |
| AP1B1 | 162 |
| AP2A1 | 160 |
| AP2A2 | 161 |
| AP2B1 | 163 |
| AP2M1 | 1173 |
| AP1M2 | 10053 |
| AP3D1 | 8943 |
| AP4E1 | 23431 |
| DAB2 | 1601 |
| LDLRAP1 | 26119 |
| GGA1 | 26088 |
| GGA2 | 23062 |
| GGA3 | 23163 |
| ARF1 | 375 |
| ARF3 | 377 |
| ARF4 | 378 |
| ARF5 | 381 |
| ARF6 | 382 |
| SH3GL2 | 6456 |
| SH3GL1 | 6455 |
| SH3GL3 | 6457 |
| SH3GLB1 | 51100 |
| SH3GLB2 | 56904 |
| EEA1 | 8411 |
| SNAP91 | 9892 |
| EPS15 | 2060 |
| EPS15L1 | 58513 |
| ITSN2 | 50618 |
| DNM1 | 1759 |
| DNM2 | 1785 |
| DNM3 | 26052 |
| EPN1 | 29924 |
| EPN2 | 22905 |
| EPN3 | 55040 |
| PICALM | 8301 |
| HIP1 | 3092 |
| HIP1R | 9026 |
| SYNJ1 | 8867 |
| SYNJ2 | 8871 |
| CAV1 | 857 |
| CAV2 | 858 |
| CAV3 | 859 |
| ITSN1 | 6453 |
| RAC1 | 5879 |
| PIP5K1A | 8394 |
| EZR | 7430 |
| ARRB1 | 408 |
| ARRB2 | 409 |
| PACSIN3 | 29763 |
| CAMK1 | 8536 |
| BIN1 | 274 |
| HGS | 9146 |
| BECN1 | 8678 |
| ATG12 | 9140 |
| MAP1LC3A | 84557 |
| TSG101 | 7251 |
| PDCD6IP | 10015 |
| VPS4A | 27183 |
| VPS36 | 51028 |
| LAMP1 | 3916 |
| CBL | 867 |
| CBLB | 868 |
| NEDD4 | 4734 |
| NEDD4L | 23327 |
| CBLC | 23624 |
| ADAM10 | 102 |
| VAPB | 9217 |
| ASAP2 | 8853 |
| CYTH3 | 9265 |
| GORASP1 | 64689 |
| CLINT1 | 9685 |
| SAR1A | 56681 |
| COPA | 1314 |
| NSF | 4905 |
| SEC13 | 6396 |
| VCP | 7415 |
| ERC1 | 23085 |
| MAPK8IP2 | 23542 |
| MAPK8IP3 | 23162 |
| ATP6V0A1 | 535 |
| VAPA | 9218 |
| ATM | 472 |
| GIT1 | 28964 |
| SYT1 | 6857 |
| SYT2 | 127833 |
| VAMP1 | 6843 |
| VAMP2 | 6844 |
| MAP4K2 | 5871 |
| AMPH | 273 |
| PIK3C2G | 5288 |
| PIK3CG | 5294 |
| PI4KA | 5297 |
| IP6K3 | 117283 |
| CFL1 | 1072 |
| DIAPH1 | 1729 |
| LIMK1 | 3984 |
| PAK1 | 5058 |
| ARPC3 | 10094 |
| ARPC4 | 10093 |
| ARPC5 | 10092 |
| ARPC1B | 10095 |
| ACTR2 | 10097 |
| ACTR3 | 10096 |
| WAS | 7454 |
| WASF1 | 8936 |
| WASF2 | 10163 |
| WASF3 | 10810 |
| ARPC2 | 10109 |
| FYN | 2534 |
| ROCK1 | 6093 |
| ROCK2 | 9475 |
| TNIK | 23043 |
| PACSIN1 | 29993 |
| EFS | 10278 |
| CDC42 | 998 |
| RHOA | 387 |
| GRB2 | 2885 |
| ARFIP2 | 23647 |
| STAU1 | 6780 |
| VAV2 | 7410 |
| MAPK8IP1 | 9479 |
| CIB2 | 10518 |
| CIB1 | 10519 |
| CIB3 | 117286 |
| RAB1A | 5861 |
| RAB2A | 5862 |
| RAB3A | 5864 |
| RAB3B | 5865 |
| RAB3C | 115827 |
| RAB3D | 9545 |
| RAB4A | 5867 |
| RAB4B | 53916 |
| RAB5A | 5868 |
| RAB5B | 5869 |
| RAB5C | 5878 |
| RAB6A | 5870 |
| RAB6B | 51560 |
| RAB7B | 338382 |
| RAB8A | 4218 |
| RAB8B | 51762 |
| RAB11A | 8766 |
| RAB11B | 9230 |
| RAB29 | 8934 |
| RAB11FIP5 | 26056 |
| SNX1 | 6642 |
| SNX2 | 6643 |
